# Supplementary material for: Problems with ethical approval and how to fix them: lessons from three trials in rheumatoid arthritis
Source: HighWire-hosted journal article supplement (doi:10.1136/bmj.i4626), 2016-09-09
Supplement: bmj.i4626.pdf [file bmj.i4626.pdf]

## 伦理批准的问题以及如何解决这些问题： 来自三个类风湿关节炎试验的教训

Problems with ethical approval and how to fix them: lessons from three trials in rheumatoid arthritis

来源:BMJ 2016;354:i4626 doi: 10.1136/bmj.i4626

为了确保临床试验设计的合理,从而尽可能使参与者的风险降至最低并且使参与者清楚知晓所有严重的风险,临床试验往往费用昂贵且具有繁琐的监管。我们对最近的3项类风湿关节炎试验进行了分析,以评估当前的监管框架是否满足这些目标,并且审查了相关管理文件独立监管存储的情况。

最近的一项研究报告,在生物制剂改善病情的抗风湿药物临床试验中,超过10 000例类风湿关节炎患者被随机分配到对照组并接受无效治疗,导致这些患者担负“不可逆转的健康恶化”的风险<sup>1</sup>。我们调查了此研究中关于药物 ocrelizumab 的两个试验 (STAGE<sup>2</sup> 和 FEATURE<sup>3</sup>) 的伦理审批过程和给患者的信息。我们也审核了一项使用顺势疗法治疗类风湿关节炎试验的文件,因为曾有报告该试验存在补充和替代医疗相关的伦理批准和知情同意问题<sup>4</sup>。类风湿关节炎是一种常见疾病,近20年已研制出许多新疗法,因此探索上述与医学所有领域都相关的临床试验问题,是理想的办法。

### 获得伦理文件的障碍

在获取所有试验的文件及信息的过程中,我们经历了漫长的等待以及来自各方面的挑战。基因泰克/罗氏 (Genentech/

Roche) 赞助了 STAGE 和 FEATURE 两项试验。通过发送电子邮件以及致电的方式, JM 与公司取得了联系, 询问使用安慰剂对照组的理由, 并要求得到关于此问题的伦理委员会文件和通信副本以及参与者得到的文件副本 (一份知情同意书模板和患者信息表)。起初罗氏公司拒绝了这一要求, 声称英国的制药行业协会的行为准则禁止直接向患者进行药物商业促销。尽管 JM 不是医疗专业人员, 但在请求当中附有 JM 所属研究机构的个人电子邮箱地址和解释我们的研究目的。我们惊讶地发现这一规定被当作信息不共享的理由。随即, BG (参与这个项目的3位医生之一) 联系了罗氏。尽管罗氏将伦理批准过程中的部分文件副本寄给了我们, 但他们拒绝提供所有与伦理委员会通信的文件副本, 并解释“ocrelizumab 正在接受监管且这些资料属于机密文件档案”。然后, 我们根据英国《信息自由法案》, 要求从卫生研究当局获得了这些文件。

我们选择这项在 Wrightington、Wigan 和 Leigh 国家健康体系 (NHS) 信托基金进行的顺势疗法试验, 是因其作为补充和替代医疗研究存在伦理问题的例子, 而被社交媒体关注<sup>5</sup>。我们向信托基金会请求获得所有已提交给伦理委员会的试验相关文件副本, 及所有与该委员会进行沟通的信件。该信托基金会迅速回复了

Jonathan Mendel  
lecturer in human  
geography<sup>1</sup>,  
Ben Goldacre  
senior clinical  
research fellow<sup>2</sup>,  
Edzard Ernst  
emeritus professor<sup>3</sup>,  
Samuel Whittle  
consultant  
rheumatologist<sup>4</sup>

<sup>1</sup>Geography, School of Social Sciences, University of Dundee, Dundee, DD1 4HN, UK;  
<sup>2</sup>Centre for Evidence-Based Medicine, University of Oxford, Oxford, UK;  
<sup>3</sup>Peninsula Medical School, University of Exeter, Exeter, UK;  
<sup>4</sup>Discipline of Medicine, University of Adelaide, Australia

Correspondence to:  
J Mendel j.m.mendel@dundee.ac.uk

王炎焱 译  
王一雯  
黄烽 校  
解放军总医院  
风湿科

我们,但声称许多相关文件已经丢失。经过广泛沟通,我们最终收到了所有我们请求查看的信息。

为了评估安慰剂应用的批准过程、判断以人为参与者的研究是否符合伦理要求,以及确定参与者是否已完全知晓对照组的缺点或风险相关信息,我们对相关的试验文件进行了审核。

## 降低风险的问题

### Ocrelizumab 试验

FEATURE 和 STAGE 试验将对甲氨蝶呤治疗反应欠佳并处于活动期的类风湿关节炎患者随机分配至 ocrelizumab 组或安慰剂+甲氨蝶呤组,并进行长期治疗(在 STAGE 中长达 48 周),在此之后,患者经重分配并接受有效药物治疗或者 ocrelizumab 的开放性治疗。因为利妥昔单抗(具有 ocrelizumab 相同的分子作用靶点)已被证实可用于治疗活动性类风湿关节炎,所以前述行为可能潜在剥夺了参与者长达 1 年的有效治疗时间。不充分的治疗会导致不可逆的结构破坏、额外的痛苦和功能障碍。

FEATURE 试验的伦理申请表中承认“本研究涉及的主要伦理问题是对照组需要输注 ocrelizumab 的安慰剂。然而,这组患者在整个研究过程中都会接受甲氨蝶呤的治疗,而甲氨蝶呤已被许多研究机构认为是标准的一线治疗药物。另外,参与者可以继续接受在试验前已维持在稳定剂量的止痛剂、非甾体抗炎药(NSAIDs)和类固醇类药物治疗”。

甲氨蝶呤被用作一线治疗药物,但试验参与者是已对甲氨蝶呤治疗反应欠佳的患者,所以对对他们来说,甲氨蝶呤已不再是一线药物。申请人引用 Kapral 及同事<sup>6</sup>的一项单独队列研究作为证明甲氨蝶呤治疗有效的证据,该研究提出即使是此前已使用甲氨蝶呤失败的患者再次接受甲氨蝶呤亦可见到疗效。然而,这项研究的结果难以得到广泛认可,且其初始的甲氨蝶呤剂量(中位数 10 mg)比 FEATURE 试验低很多(基线剂量为 16.3 mg)。在 Kapral 队列研究中,大多数患者使用甲氨蝶呤的初始剂量类似于 FEATURE 试验,而“再次使用”并无疗效。对于缓解风险的讨论应基于现有可获得证据的文献综述,而不是仅依靠单个研究。

另一个试验设计的伦理问题是允许补救治疗,但不是非强制性的。在 STAGE 试验当中,虽然安

慰剂组患者处于疾病的基线活动期并且已对甲氨蝶呤反应欠佳,但是仅 26% 的患者接受了补救治疗,这个事实体现出了通过补救治疗从而实现阶梯治疗存在现实困难,或是意识到的困难。此外,只有 27.6% 的安慰剂组患者在治疗 48 周时,综合测量疾病活动改善(ACR20)达到 20%,相当于一个较小的临床疗效。

在 STAGE 试验中,与对照组相比,接受有效药物的参与者得到了显著的结构受益,提示应用安慰剂的患者尽管可用补救治疗但仍处于劣势。使用其他已被证实有效的生物制剂作为对照,可减少此种风险。

研究伦理委员会要求 FEATURE 试验“针对安慰剂组患者是否被剥夺使用其他治疗方案权利的问题进行说明”。然而,“患者根据需要可以采用额外的药物(非甾体抗炎药和类固醇)并可选择退出治疗”的补充说法似乎得到了委员会的认可。我们没有发现委员会对该关键问题进行进一步讨论,且未发现将其他生物制剂作为主动对照(尽管这些生物制剂已被广泛用于治疗处于该疾病阶段的患者)。

### 顺势疗法

顺势疗法伦理表格中列举的排除标准与研究方案不同,委员会未表示是否支持这种做法。此外,某些试验的排除标准似乎并不合理,因为顺势疗法超过 C12 效能(即将药物按照 1:100 稀释 12 次,最终稀释浓度至 1:10<sup>24</sup>)后,并不含有可与例如生物制剂相互作用的活性分子。

## 在知情同意沟通过程中未告知安慰剂风险

罗氏公司向英国伦理委员会仅提供了 FEATURE 试验申请表中的部分内容。承认“这项研究的主要伦理问题是对照组需要输注 ocrelizumab 的安慰剂”。然而,委员会并没有确保参与者已被告知此事。对于特定风险的程度和委员会是否必须告知患者所有的已知信息,尚存在专业争论。然而,重要的是参与者知晓该研究的主要问题,有助于他们知情并做出选择;事实上对照组的的治疗被认为是主要的伦理问题,因此建议应该让参与者知情。至少伦理委员会应该讨论这个信息是否应该共享。

两个药物试验的知情同意表中没有明确地声明安慰剂对照组的额外风险,如疼痛加重、功能障碍和永久性的结构损害。另外,尽管提到了糖皮质激素的风险,但是知情同意表中没有明确地阐述进行补救治疗时激素剂量增加所带来的风险。

### 没有就先前的研究方法学缺陷及结果进行沟通

伦理委员会批准了顺势疗法试验者提出的征求知情同意的提纲程序。然而,其提供的信息是有问题的。告知患者的信息(伦理审查后被修订)称顺势疗法药物“通常为矿物或草药”。这暗示了它们含有活性成分,但实际上当顺势疗法药物被稀释超过C12效能后是不含活性分子的。告知患者的信息声称“目前对顺势疗法药物疗效探索的临床证据非常少”,但没有说明现有的所有证据均未能证明高度稀释的顺势疗法药物是优于安慰剂的<sup>7</sup>。

告知患者的信息指出,“这项研究可能使你或未来的患者受益,因为研究结果将为治疗提供信息”。赞助商NHS信托基金宣称“经过适当的科学评论程序证明本研究方案是有价值的且具有高科学质量”。然而,伦理委员会注意到,一项小样本非随机且与先前较高质量试验相似的顺势疗法试验,很难改变当前的最佳证据。在知情同意后,部分或全部患者仍可能决定参与研究,但是伦理表中并没有讨论该研究是否有效使用了患者的时间或NHS资源。

### 未来的更大透明度

我们的分析提示伦理委员会的批准并不代表其伦理问题已被充分审查、研究方案设计合理、最佳证据已被充分考虑及风险已降至最低。同样的,即便患者已签署知情同意书,并不代表临床医生、研究人员以及患者认为知情同意书中的内容都是合适的。我们意识到每个研究或文件都有可能产生意见分歧,而最好的解决办法是将流程透明化:任何人都有机会看到伦理审查的任何细节以及告知患者的实际信息,从而对其进行严格的评价。但是,目前获取相关文件仍十分困难。

这些问题在整个医学领域内都是很重要的。从我们的经验来看,许多类风湿关节炎的生物制剂研究、补充和替代治疗研究或者其他医学研究都可能存在相似的方法学问题。尽管最理想的方法是

对多个大样本研究进行系统性综述,但是获取基本的伦理文件就已存在很多困难了,意味着系统性综述的方法是不可行的。

监管不力的研究可以对患者造成直接的伤害并逐渐破坏其可靠性。然而,我们可以通过努力改进这些不足。我们提出以下针对医学研究的建议:

对目前既有的以及拟实行治疗的证据进行系统性综述——对既有的与该课题相关的内容进行全面调查,有助于对拟开展研究的潜在作用、风险及获益建立深刻的认识。在上面的例子中,系统性综述可以使伦理委员会和试验参与者对现有证据具有更清晰的认识。即便系统性综述不够充分(例如,调查人员的综述可能存在高度偏倚),能够在严格审查时提供参考信息也是一种进步。

评估并告知患者拟开展研究的质量——理想的是,伦理委员会或其他相关部门将会对调查者提供的证据以及研究方案的质量进行严格审查。但实际上是有巨大的灰色地带的,伦理委员会应当拒绝那些完全不能提供足够信息的研究。如果伦理程序允许质量较差的研究通过,应当明确告知患者该研究的局限性,以便其在知情后做出合理选择。这可能成为Iain Chalmers描述的“以患者为本的高质量对照试验指南”的一部分。

确保风险得到合理的降低——包括与安慰剂相关的风险。

给患者一个现有证据和任何参与风险的汇总——参与者何时可能面临研究风险,或者此前的哪项研究对治疗的合理性提出过疑问,应将这些问题清楚明确地告知参与者。

自由获取所有伦理审批和知情同意文件——研究的注册信息应附有空白知情同意书及参与者信息表,以便公开获取。另外,应该将与伦理委员会或具有类似职能机构的通信函进行定期公开。这将有助于对伦理过程独立审查、公开讨论和示范教学。

大规模的研究可帮助我们进一步明确此前提到的伦理批准和知情同意问题的普遍度。通过这样的研究,我们可以评估委员会之间的差异,并促进问责制的实行。至少,对机构和国家伦理审查部门的透明政策进行审查是很有必要的。对于公众来说,伦理审查过程非常重要,应该进行公开监督。信息公开政策有助于参与者的风险最小化并维护公众信任度,因此至关重要。



### 顺势疗法伦理文件中的不一致

顺势疗法试验伦理委员会的表格中指出,排除正在使用生物活性药物或在此前6个月内接受过顺势疗法的患者。但是,研究方案中的排除标准是“排除未满18岁、既往接受过顺势疗法、已怀孕或正在进行母乳喂养或已患可能影响类风湿性关节炎治疗的严重并发症的患者。伦理表中并未提及未满18岁或母乳喂养者是被排除的。

致谢: We thank Candice Estellat and Philippe Ravaud for data sharing; Candice Estellat for broader discussions; Iain Chalmers for helpful suggestions; and HRA, Roche, Wrightington, Wigan and Leigh NHS Foundation Trust, and Genentech for the information they shared. We are also grateful to the reviewers and editors for their constructive suggestions. JM's contribution benefited from discussions about ethics with Yvonne Hail, Nicholas Fyfe, Alison Reeves, and in Dundee's social research methods MSc classes.

贡献者与机构(Contributors and sources): JM is a social researcher who has worked on questions of evidence and policy. BG is a clinical academic working on evidence based medicine and research integrity. EE has carried out extensive work on the critical evaluation of alternative medicine, and SW is an experienced consultant rheumatologist who helped to establish the Australia & New Zealand Musculoskeletal Clinical Trials Network. This article arose from discussions between JM and BG about consent, equipoise, transparency, and ethics committee processes. The information sources were the trial reports, ethics committee materials (where available), related documents, and our correspondence with some of the parties involved. JM and BG conceived the study. JM wrote the first draft. SW led on critiquing the Roche trials, EE on critiquing the homeopathy trial. All authors revised and extended the paper. JM is guarantor.

利益竞争(Competing interests): We have read and understood BMJ policy on declaration of interests and declare the following: BG reports personal fees/additional income from speaking and writing for lay audiences on problems in science and medicine including, as a minor theme, problems with ethics review. He has received grants from LJAF, Wellcome, Health Foundation, and NIHR. JM has received grant

funding from Oak Foundation, the Scottish Institute for Policing Research, and Scottish Crucible. He has been paid to write about problems around evidence and policy. SW reports grants from Daiichi Sankyo, personal fees and non-financial support from AbbVie and Pfizer, personal fees and non-financial support from UCB, and personal fees from Janssen, Menarini, AstraZeneca, Bristol-Myers Squibb; SW works in an academic rheumatology unit that participates in industry sponsored clinical trials.

### 参考文献

- 1 Estellat C, Ravaud P. Lack of head-to-head trials and fair control arms: randomized controlled trials of biologic treatment for rheumatoid arthritis. *Arch Intern Med* 2012;172:237-44. doi: 10.1001/archinternmed.2011.1209 pmid:22332155.
- 2 A study of ocrelizumab compared to placebo in patients with active rheumatoid arthritis continuing methotrexate treatment (STAGE). NCT00406419. 2006. <https://clinicaltrials.gov/ct2/show/NCT00406419>.
- 3 A study to evaluate ocrelizumab compared with placebo in patients with rheumatoid arthritis who have an inadequate response to methotrexate therapy (FEATURE). NCT00673920. <https://clinicaltrials.gov/ct2/show/NCT00673920>.
- 4 Lim B, Schmidt K, White A, Ernst E. Reporting of ethical standards: differences between complementary and orthodox medicine journals? *Wien Klin Wochenschr* 2004;116:500-3. doi: 10.1007/BF03040947 pmid:15379147.
- 5 Scott B. Saw this whilst waiting to see a surgeon at Wrightington hospital yesterday. Tweet, 22 Apr 2015. <https://twitter.com/bmds/status/590818022396403712>.
- 6 Kapral T, Stamm T, Machold KP, Montag K, Smolen JS, Aletaha D. Methotrexate in rheumatoid arthritis is frequently effective, even if re-employed after a previous failure. *Arthritis Res Ther* 2006;8:R46. doi:10.1186/ar1902 pmid:16507172.
- 7 National Health and Medical Research Council. NHMRC information paper: evidence on the effectiveness of homeopathy for treating health conditions. National Health and Medical Research Council, 2015. 8 Chalmers I. A guide to patient-led good controlled trials. *Lancet* 2000;356:774. doi:10.1016/S0140-6736(05)73681-3 pmid:11085725.

BMJ takes no responsibility for the accuracy of the translation from the published English language original and is not liable for any errors that may occur.

# BMJ
